# Supplementary material for: A Bayesian approach to evaluation of soil biogeochemical models
Source: Copernicus journal article supplement (doi:10.5194/bg-17-4043-2020), 2020-08-10
Supplement: Supplementary file 1 [file bg-17-4043-2020-supplement.pdf]

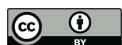

*Supplement of*

## **A Bayesian approach to evaluation of soil biogeochemical models**

**Hua W. Xie et al.**

*Correspondence to:* Hua W. Xie (xiehw@uci.edu)

The copyright of individual parts of the supplement might differ from the article licence.

**Table S1:** List of CON and AWB model parameters.

| <u>Model</u> | <u>Parameter</u> | <u>Value, if not varied</u> | <u>Units</u>                              | <u>Parameter Description</u>                 |
|--------------|------------------|-----------------------------|-------------------------------------------|----------------------------------------------|
| CON/AWB      | $I_S$            | 0.0009                      | mg C g <sup>-1</sup> soil h <sup>-1</sup> | External SOC input rate                      |
| CON/AWB      | $I_D$            | 0.0001                      | mg C g <sup>-1</sup> soil h <sup>-1</sup> | External DOC input rate                      |
| CON          | $k_{Sref}$       | Dependent                   | mg C mg <sup>-1</sup> C h <sup>-1</sup>   | SOC decay constant                           |
| CON          | $k_{Dref}$       | Dependent                   | mg C mg <sup>-1</sup> C h <sup>-1</sup>   | DOC decay constant                           |
| CON          | $k_{Mref}$       | Dependent                   | mg C mg <sup>-1</sup> C h <sup>-1</sup>   | MIC decay constant                           |
| CON          | $u_M$            | 0.002                       | mg C mg <sup>-1</sup> C h <sup>-1</sup>   | DOC uptake rate of microbes                  |
| CON          | $Ea_S$           | Fitted by HMC               | kJ mol <sup>-1</sup>                      | SOC decomposition activation energy          |
| CON          | $Ea_D$           | Fitted by HMC               | kJ mol <sup>-1</sup>                      | DOC decomposition activation energy          |
| CON          | $Ea_M$           | Fitted by HMC               | kJ mol <sup>-1</sup>                      | MIC decomposition activation energy          |
| CON          | $a_{DS}$         | Fitted by HMC               |                                           | DOC to SOC transfer coefficient              |
| CON          | $a_{SD}$         | Fitted by HMC               |                                           | SOC to DOC transfer coefficient              |
| CON          | $a_M$            | Fitted by HMC               |                                           | MIC to SOC transfer coefficient              |
| CON/AWB      | $a_{MS}$         | Fitted by HMC               |                                           | Fraction of dead MIC transferred             |
| AWB          | $K_{ref}$        | Dependent                   | mg C g <sup>-1</sup> soil                 | SOC reference $K_M$                          |
| AWB          | $K_{Uref}$       | Dependent                   | mg C g <sup>-1</sup> soil                 | DOC uptake into MIC reference $K_M$          |
| AWB          | $V_{ref}$        | Fitted by HMC               | mg C mg <sup>-1</sup> C h <sup>-1</sup>   | SOC reference $V_{max}$                      |
| AWB          | $V_{Uref}$       | Fitted by HMC               | mg C mg <sup>-1</sup> C h <sup>-1</sup>   | DOC uptake into MIC reference $V_{max}$      |
| AWB          | $Ea_K$           | Fitted by HMC               | kJ mol <sup>-1</sup>                      | SOC $K_M$ activation energy                  |
| AWB          | $Ea_{KU}$        | Fitted by HMC               | kJ mol <sup>-1</sup>                      | DOC uptake $K_M$ activation energy           |
| AWB          | $Ea_V$           | Fitted by HMC               | kJ mol <sup>-1</sup>                      | SOC $V_{max}$ activation energy              |
| AWB          | $Ea_{VU}$        | Fitted by HMC               | kJ mol <sup>-1</sup>                      | DOC uptake $V_{max}$ activation energy       |
| AWB          | $r_E$            | Dependent                   | mg C mg <sup>-1</sup> C h <sup>-1</sup>   | Enzyme production rate                       |
| AWB          | $r_L$            | 0.0005                      | mg C mg <sup>-1</sup> C h <sup>-1</sup>   | Enzyme loss rate                             |
| AWB          | $r_M$            | Dependent                   | mg C mg <sup>-1</sup> C h <sup>-1</sup>   | MIC death rate                               |
| AWB          | $E_{Cref}$       | Fitted by HMC               | mg C mg <sup>-1</sup> C                   | Reference temperature C use efficiency (CUE) |
| AWB          | $m_t$            | Fitted by HMC               | °C <sup>-1</sup>                          | CUE temperature change slope                 |

4

6

8

10

12

14

16 **Section S1**

18 **(a) CON ODE system equations**

18 The conventional (CON) model consists of three C pools in SOC, DOC, and MIC. The mass transfer of C between  
 20 these pools is represented as first-order linear decay processes. The CON model obeys the following dynamics:

$$\frac{dS}{dt} = I_S + a_{DS}k_D D + a_M a_{MS} k_M M - k_S S \quad (S1)$$

$$\frac{dD}{dt} = I_D + a_{SD}k_S S + a_M(1 - a_{MS})k_M M - u_M D - k_D D \quad (S2)$$

$$\frac{dM}{dt} = u_M D - k_M M \quad (S3)$$

26 The decay constants  $k_I$  vary from their reference values  $k_{Iref}$  based on the Arrhenius equation of temperature  
 28 dependence,

$$k_I = k_{Iref} \exp \left[ -\frac{E a_I}{R} \left( \frac{1}{T} - \frac{1}{T_{ref}} \right) \right] \quad (S4)$$

32 where  $R$  is the ideal gas constant  $8.314 \text{ J mol}^{-1} \text{ K}^{-1}$  and the reference temperature  $T_{ref}$  used was  $283.15 \text{ K}$ .

34  $\text{CO}_2$  soil flux is calculated from the CON model by summing the proportion of fluxes that do not enter soil C pools  
 36 at each time step:

$$\text{CON flux} = k_S S(1 - a_{SD}) + k_D D(1 - a_{DS}) + k_M M(1 - a_M) \quad (S5)$$

38 Response ratios are then calculated from the model output flux by dividing the flux calculated at a given time point  
 40 by the pre-warming steady state flux.

42 **(b) AWB ODE system equations**

42 The Allison-Wallenstein-Bradford (AWB) model consists of four C pools in SOC, DOC, MIC, and ENZ  
 44 (representing the extracellular enzyme C mass). In the AWB model, MIC accumulation and SOC decomposition  
 46 follow a non-linear Michaelis-Menten function. Other processes, including ENZ production, ENZ loss, and MIC  
 death still follow a first-order linear decay process. The AWB system equations are as follows:

$$\frac{dS}{dt} = I_S + a_{MS} r_M M - \frac{VES}{K + S} \quad (S6)$$

$$\frac{dD}{dt} = I_D + (1 - a_{MS}) r_M M + \frac{VES}{K + S} + r_L E - \frac{V_U MD}{K_U + D} \quad (S7)$$

$$\frac{dM}{dt} = E_C \frac{V_U MD}{K_U + D} - r_M M - r_E M \quad (S8)$$

$$\frac{dE}{dt} = r_E M - r_L E \quad (S9)$$

56 Similar to the CON decay constants, the Michaelis-Menten function parameters  $K$ ,  $K_U$ ,  $V$ , and  $V_U$  vary from their  
 58 reference values based on the Arrhenius equation.  $E_C$ , the AWB microbial C use efficiency parameter, depends  
 linearly on temperature, following Li et al., 2014, and operates under the simplifying assumption that higher  
 60 temperatures make C use slightly less efficient:

$$E_C = E_{Cref} - m_t(T - T_{ref}) \quad (S10)$$

62  
64  
66  
68  
70  
72  
74  
76  
78  
80  
82  
84  
86  
88  
90  
92  
94  
96  
98  
100  
102  
104  
106  
108  
110  
112  
114  
116

The loss rate parameters  $r_l$  were not made to be temperature dependent.

AWB CO<sub>2</sub> flux is calculated as the proportion of the C transfer out of the DOC pool that is not partitioned into the MIC pool:

$$\text{AWB flux} = (1 - E_c) \frac{V_U MD}{K_U + D} \quad (\text{S11})$$

## Section S2

118

(a) Re-arranged CON steady state equations

120

The steady state solutions for the C pools in CON are as follows:

122

$$D_0 = \frac{a_{SD}I_S + I_D}{u_M + k_D + u_M a_M (a_{MS} - a_{MS} a_{SD} - 1) - a_{DS} k_D a_{SD}} \quad (S12)$$

124

$$M_0 = \frac{u_M}{k_M} D_0 \quad (S13)$$

126

$$S_0 = \frac{I_S + D_0 (a_{DS} k_D + u_M a_M a_{MS})}{k_S} \quad (S14)$$

128

To set pre-warming steady state soil C densities to desired values, we re-arranged the steady state equations into the following forms to solve for the steady state values of parameters that depend on the soil C densities:

130

$$k_{Mref} = \frac{u_M D_0}{M_0} \quad (S15)$$

132

$$k_{Dref} = \frac{-I_D - a_{SD} I_S + u_M D_0 - a_M D_0 u_M + a_M a_{MS} u_M D_0 - a_M a_{MS} a_{SD} u_M D_0}{(a_{DS} a_{SD} - 1) D_0} \quad (S16)$$

134

$$k_{Sref} = \frac{I_S + D_0 (a_{DS} k_{Dref} + u_M a_M a_{MS})}{S_0} \quad (S17)$$

136

(b) Re-arranged AWB steady state equations

138

The steady state solutions for the C pools in AWB are as follows:

140

$$S_0 = \frac{-r_L K (I_S (r_M (1 + E_C (a_{MS} - 1)) + r_E (1 - E_C)) + E_C I_D a_{MS} r_M)}{I_S (r_M (r_L (1 + E_C (a_{MS} - 1))) + r_E (r_L (1 - E_C) - E_C V)) + E_C I_D (a_{MS} r_M r_L - r_E V)} \quad (S18)$$

142

$$M_0 = \frac{E_C (I_D + I_S)}{(1 - E_C) (r_M + r_E)} \quad (S19)$$

144

$$D_0 = \frac{-K_U (r_M + r_E)}{r_M + r_E - E_C V_U} \quad (S20)$$

146

$$E_0 = \frac{r_E M_0}{r_L} \quad (S21)$$

148

To set pre-warming steady state soil C densities to desired values, we re-arranged the steady state equations into the following forms:

150

$$r_E = \frac{r_L E_0}{M_0} \quad (S22)$$

152

$$r_M = \frac{-E_{Cref} (I_D + I_S) + M_0 r_E (1 - E_{Cref})}{M_0 (E_{Cref} - 1)} \quad (S23)$$

154

$$K_{Uref} = \frac{-D_0 (r_M + r_E - E_{Cref} V_{Uref})}{r_M + r_E} \quad (S24)$$

$$K_{ref} = \frac{-S_0 \left( -I_S r_E r_L + E_{C_{ref}} I_S r_E r_L - a_{MS} E_{C_{ref}} I_D r_L r_M - I_S r_L r_M + E_{C_{ref}} I_S r_L r_M - a_{MS} E_{C_{ref}} I_S r_L r_M + E_{C_{ref}} I_D r_E V_{ref} + E_{C_{ref}} I_S r_E V_{ref} \right)}{r_L \left( -I_S r_E + E_{C_{ref}} I_S r_E - a_{MS} E_{C_{ref}} I_D r_M - I_S r_M + E_{C_{ref}} I_S r_M - a_{MS} E_{C_{ref}} I_S r_M \right)}$$

(S25)

156  
 158  
 160  
 162  
 164  
 166  
 168  
 170  
 172  
 174  
 176  
 178  
 180  
 182  
 184  
 186  
 188  
 190  
 192  
 194  
 196  
 198  
 200  
 202  
 204  
 206

208 **Figure S1:** Distribution of CON and AWB fits to meta-analysis data (Romero-Olivares et al., 2017) with CON fits  
 210 at (a) MIC = 1 mg C g<sup>-1</sup> soil; and (b) MIC = 8 mg C g<sup>-1</sup> soil.; and AWB fits at (c) MIC = 1 mg C g<sup>-1</sup> soil; and (d)  
 212 MIC = 8 mg C g<sup>-1</sup> soil. Open circles show the meta-analysis data points. Blue vertical lines mark the 95%  
 214 confidence interval for each data point calculated from the pooled standard deviation. The black line indicates the  
 mean posterior predictive model fit. The orange shading marks the 95% posterior predictive interval for the fit. Non-  
 MIC pre-warming steady state soil C densities were set at SOC = 100 mg C g<sup>-1</sup> soil, DOC = 0.2 mg C g<sup>-1</sup> soil, and  
 ENZ = 0.1 mg C g<sup>-1</sup> soil.

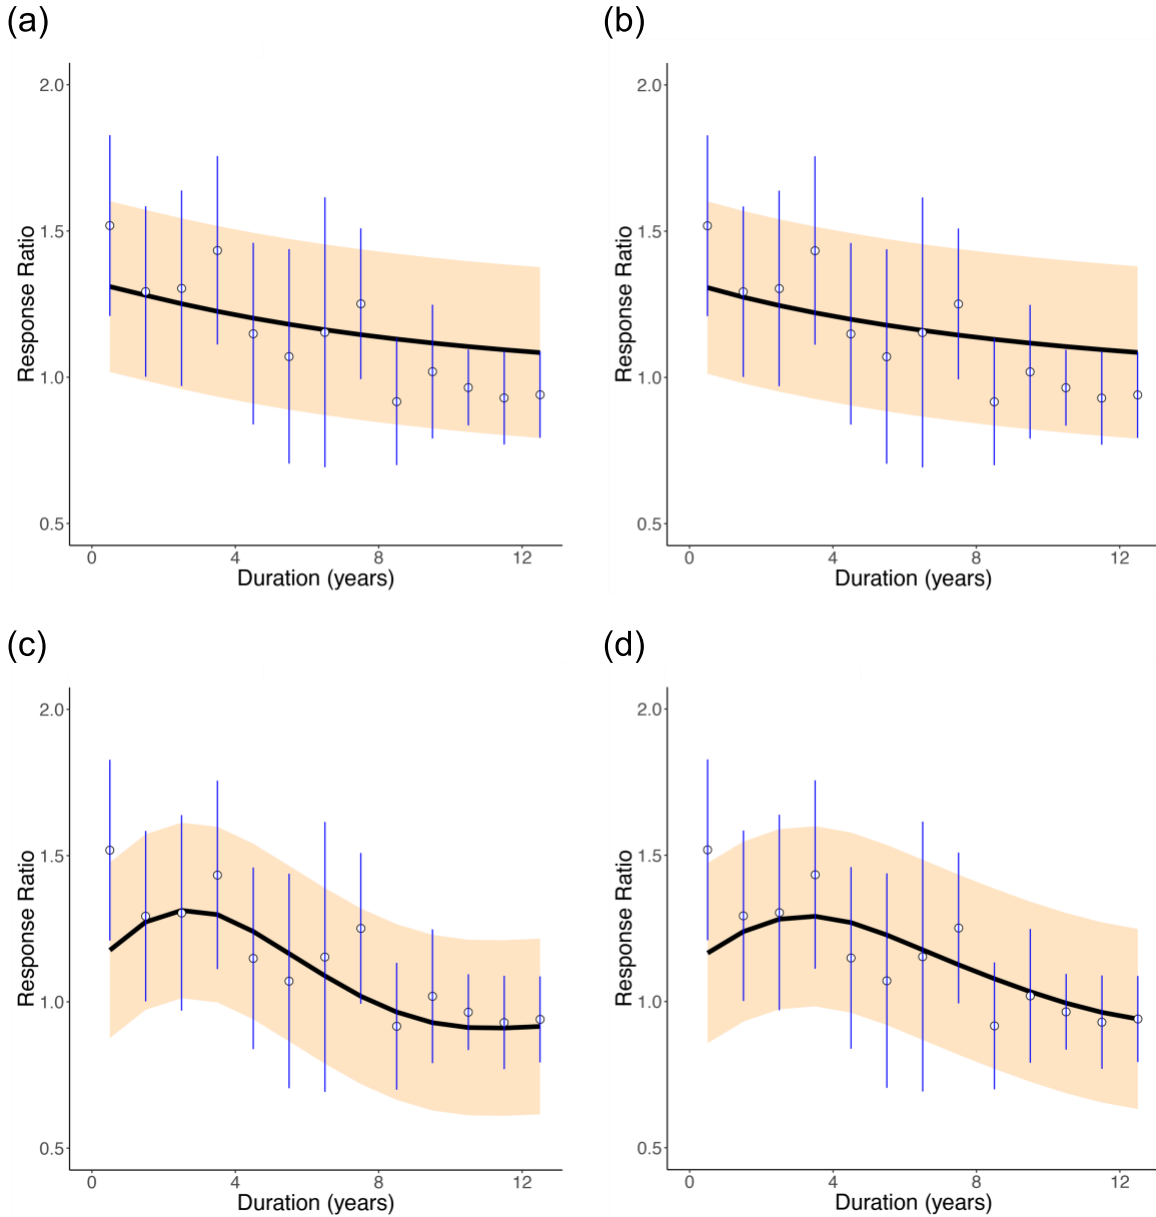

216  
 218  
 220  
 222

224 **Figure S2:** 95% probability density credible areas for (a) AWB  $V_{U_{ref}}$ ; and (b)  $m_t$  parameters corresponding to pre-  
226 warming steady state SOC = 100 mg C g<sup>-1</sup> soil, DOC = 0.2 mg C g<sup>-1</sup> soil, MIC = 2 mg C g<sup>-1</sup> soil, and ENZ = 0.1 mg  
C g<sup>-1</sup> soil. Yellow shaded regions represent 80% credible areas and vertical purple lines indicate distribution mean.

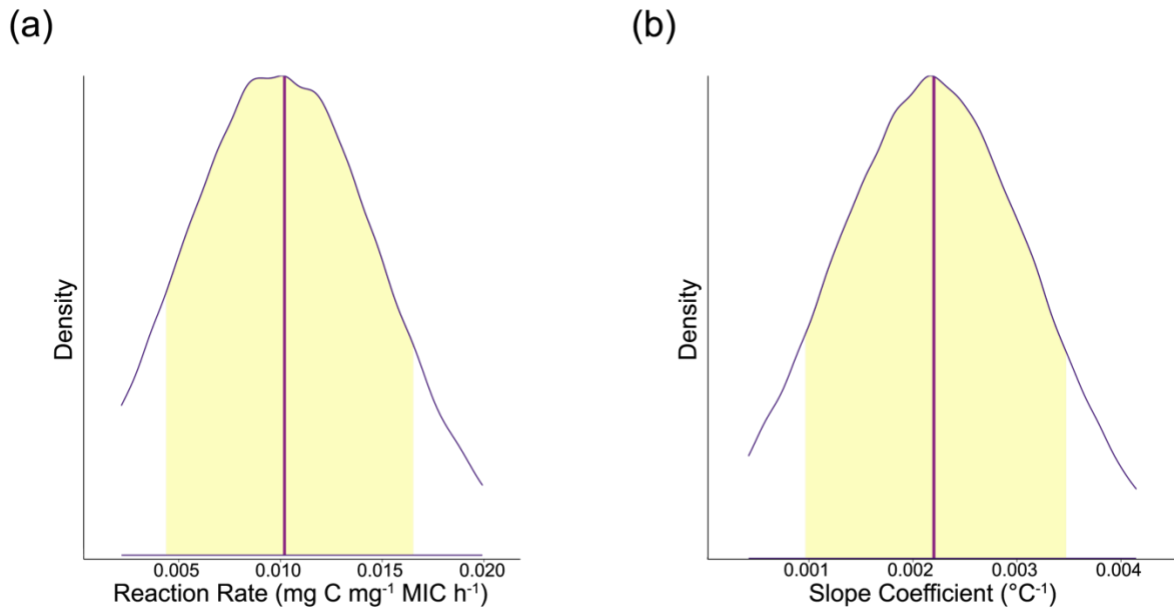

228  
230  
232  
234  
236  
238  
240  
242  
244  
246  
248  
250  
252  
254  
256



258 **Figure S3:** Response ratios of model SOC stocks after 12.5 years of warming in AWB and CON simulations. **(a)**  
260 Pre-warming steady state SOC varied from 50 to 200 mg C g<sup>-1</sup> soil, with pre-warming MIC, DOC and ENZ held  
262 constant respectively at 2 mg C g<sup>-1</sup> soil, 0.2 mg C g<sup>-1</sup> soil, and 0.1 mg C g<sup>-1</sup> soil; **(b)**, Pre-warming MIC varied from  
1 to 8 mg C g<sup>-1</sup> soil, with pre-warming SOC, DOC and ENZ held constant, respectively, at 100 mg C g<sup>-1</sup> soil, 0.2 mg  
C g<sup>-1</sup> soil, and 0.1 mg C g<sup>-1</sup> soil.

(a)

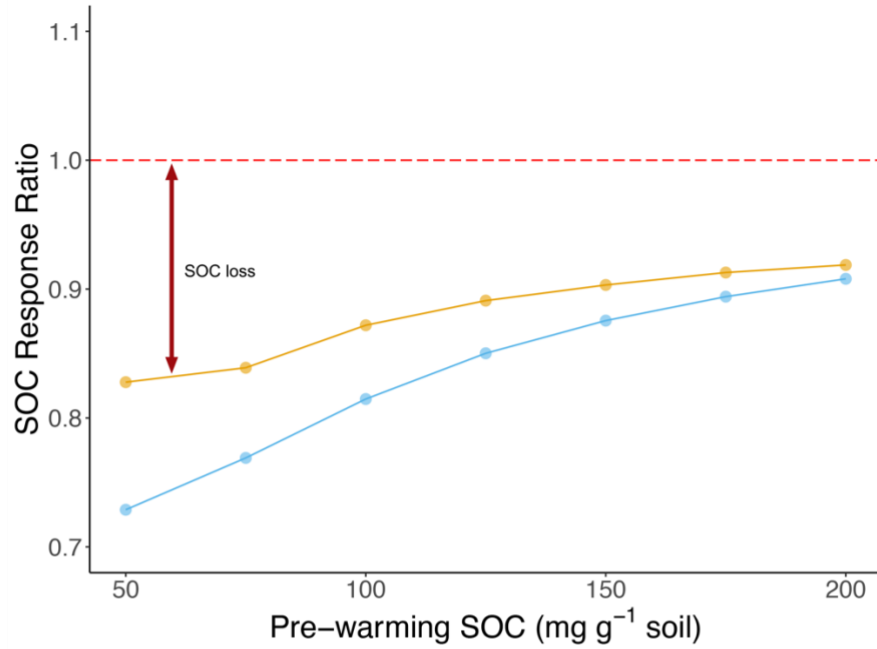

(b)

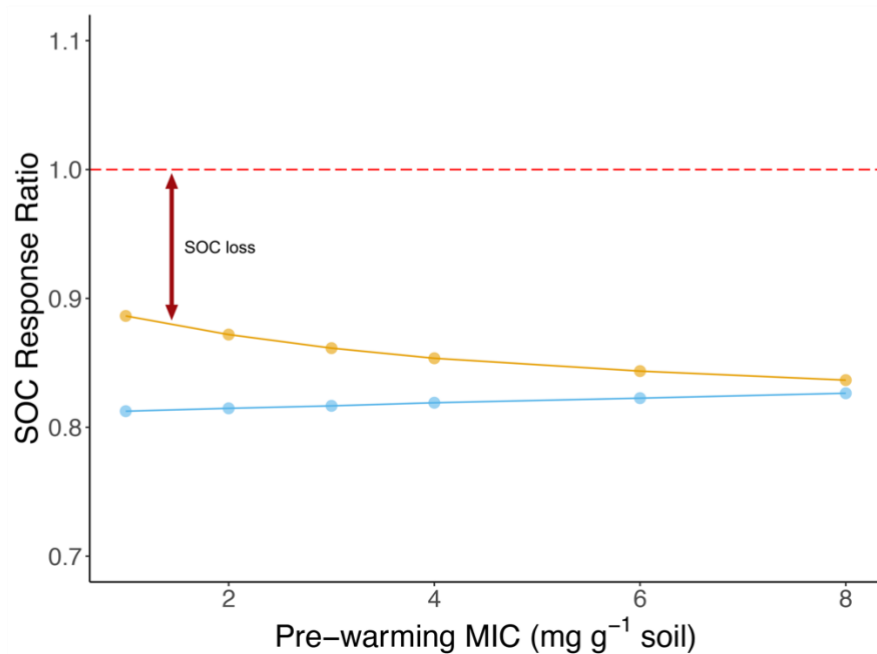

264 **Table S2: (a)** AWB; and **(b)** CON prior distribution tables. Including  $\sigma$ , the residual error scale term, we fit 10  
 266 parameters in our AWB runs and 8 parameters in our CON runs. Normal, Gaussian priors were used for all fitted  
 268 ODE model parameters. The notation we use for our normal distributions follows an N(mean, standard deviation)  
 distribution per recommendations from literature (Gelman, 2006).

270 **(a) CON priors**

| Parameter | Distribution | Parameter Description            |
|-----------|--------------|----------------------------------|
| $Ea_S$    | N(50,25)     | SOC activation energy            |
| $Ea_D$    | N(50,25)     | DOC activation energy            |
| $Ea_M$    | N(50,25)     | MIC activation energy            |
| $a_{DS}$  | N(0.3,0.15)  | DOC to SOC transfer coefficient  |
| $a_{SD}$  | N(0.3,0.15)  | SOC to DOC transfer coefficient  |
| $a_M$     | N(0.3,0.15)  | MIC to SOC transfer coefficient  |
| $a_{MS}$  | N(0.5,0.25)  | Fraction of dead MIC transferred |
| $\sigma$  | Cauchy(0,1)  | Residual Error Scale             |

272 **(b) AWB priors**

| Parameter  | Distribution   | Parameter Description                   |
|------------|----------------|-----------------------------------------|
| $V_{ref}$  | N(0.4,0.2)     | SOC reference $V_{max}$                 |
| $V_{Uref}$ | N(0.01,0.005)  | DOC reference $V_{max}$                 |
| $Ea_V$     | N(50,25)       | SOC $V_{max}$ activation energy         |
| $Ea_{VU}$  | N(50,25)       | DOC $V_{max}$ activation energy         |
| $Ea_K$     | N(50,25)       | SOC $K_M$ activation energy             |
| $Ea_{KU}$  | N(50,25)       | DOC $K_M$ activation energy             |
| $E_{Cref}$ | N(0.4,0.2)     | Reference C use efficiency (CUE)        |
| $m_t$      | N(0.002,0.001) | CUE slope                               |
| $a_{MS}$   | N(0.5,0.25)    | Fraction of dead MBC transferred to SOC |
| $\sigma$   | Cauchy(0,1)    | Residual Error Scale                    |

274

276

278

280

282

284

286

288

290

292 **Table S3:** Posterior means calculated for parameters that were fit in HMC runs are displayed in the following  
 294 tables. Tables are presented in the order of (a) CON SOC-varied runs; (b) AWB SOC-varied runs; (c) CON MIC-

294

(a) CON posterior distribution means for SOC-varied runs

| Parameter | SOC50  | SOC75  | SOC100 | SOC125 | SOC150 | SOC175 | SOC200 |
|-----------|--------|--------|--------|--------|--------|--------|--------|
| $Ea_S$    | 77.565 | 73.582 | 66.578 | 60.796 | 56.695 | 53.602 | 51.347 |
| $Ea_D$    | 50.24  | 50.17  | 50.133 | 50.211 | 50.174 | 50.25  | 50.246 |
| $Ea_M$    | 52.612 | 52.531 | 52.143 | 52.109 | 52.07  | 51.989 | 51.836 |
| $a_{DS}$  | 0.324  | 0.325  | 0.327  | 0.327  | 0.327  | 0.327  | 0.326  |
| $a_{SD}$  | 0.334  | 0.336  | 0.336  | 0.337  | 0.337  | 0.337  | 0.337  |
| $a_M$     | 0.338  | 0.34   | 0.336  | 0.334  | 0.333  | 0.332  | 0.331  |
| $a_{MS}$  | 0.504  | 0.504  | 0.502  | 0.5    | 0.498  | 0.497  | 0.497  |
| $\sigma$  | 0.134  | 0.139  | 0.155  | 0.168  | 0.176  | 0.183  | 0.187  |

296

298 (b) AWB posterior distribution means for SOC-varied runs

| Parameter     | SOC50   | SOC75   | SOC100  | SOC125  | SOC150  | SOC175  | SOC200  |
|---------------|---------|---------|---------|---------|---------|---------|---------|
| $V_{ref}$     | 0.383   | 0.405   | 0.41    | 0.414   | 0.418   | 0.42    | 0.423   |
| $V_{U_{ref}}$ | 0.0104  | 0.0104  | 0.0104  | 0.0104  | 0.0104  | 0.0104  | 0.0104  |
| $Ea_V$        | 74.791  | 70.071  | 65.21   | 62.218  | 60.447  | 59.174  | 58.475  |
| $Ea_{VU}$     | 50.201  | 50.486  | 50.669  | 50.823  | 51.104  | 51.015  | 51.106  |
| $Ea_K$        | 25.846  | 30.357  | 35.532  | 38.395  | 40.214  | 41.404  | 42.364  |
| $Ea_{KU}$     | 49.791  | 49.671  | 49.318  | 49.265  | 49.014  | 49.013  | 48.964  |
| $E_{C_{ref}}$ | 0.204   | 0.253   | 0.337   | 0.406   | 0.454   | 0.49    | 0.513   |
| $m_t$         | 0.00184 | 0.00214 | 0.00222 | 0.00225 | 0.00227 | 0.00229 | 0.00232 |
| $a_{MS}$      | 0.495   | 0.498   | 0.5     | 0.507   | 0.514   | 0.52    | 0.526   |
| $\sigma$      | 0.152   | 0.151   | 0.16    | 0.165   | 0.17    | 0.174   | 0.178   |

300 (c) CON posterior distribution means for MIC-varied runs

| Parameter | MIC1   | MIC2   | MIC3   | MIC4   | MIC6   | MIC8   |
|-----------|--------|--------|--------|--------|--------|--------|
| $Ea_S$    | 67.472 | 66.578 | 65.991 | 65.34  | 64.076 | 62.972 |
| $Ea_D$    | 49.941 | 50.133 | 50.337 | 50.388 | 50.608 | 50.801 |
| $Ea_M$    | 50.909 | 52.143 | 53.063 | 53.862 | 54.861 | 55.681 |
| $a_{DS}$  | 0.327  | 0.327  | 0.326  | 0.327  | 0.327  | 0.327  |
| $a_{SD}$  | 0.332  | 0.336  | 0.339  | 0.342  | 0.344  | 0.346  |
| $a_M$     | 0.336  | 0.336  | 0.336  | 0.336  | 0.336  | 0.335  |
| $a_{MS}$  | 0.503  | 0.502  | 0.499  | 0.498  | 0.496  | 0.495  |
| $\sigma$  | 0.155  | 0.155  | 0.155  | 0.155  | 0.156  | 0.156  |

302

(d) AWB posterior distribution means for MIC-varied runs

| Parameter | MIC1  | MIC2 | MIC3  | MIC4  | MIC6  | MIC8  |
|-----------|-------|------|-------|-------|-------|-------|
| $V_{ref}$ | 0.403 | 0.41 | 0.413 | 0.417 | 0.422 | 0.424 |

|               |         |         |         |         |         |         |
|---------------|---------|---------|---------|---------|---------|---------|
| $V_{U_{ref}}$ | 0.0105  | 0.0104  | 0.0104  | 0.0104  | 0.0104  | 0.0104  |
| $Ea_V$        | 65.571  | 65.21   | 65.207  | 65.308  | 65.689  | 66.111  |
| $Ea_{VU}$     | 50.719  | 50.669  | 50.67   | 50.601  | 50.56   | 50.461  |
| $Ea_K$        | 34.939  | 35.532  | 35.585  | 35.467  | 35.071  | 34.936  |
| $Ea_{KU}$     | 49.441  | 49.318  | 49.4    | 49.403  | 49.608  | 49.495  |
| $E_{C_{ref}}$ | 0.26    | 0.337   | 0.395   | 0.437   | 0.495   | 0.5343  |
| $m_t$         | 0.00218 | 0.00222 | 0.00223 | 0.00224 | 0.00226 | 0.00227 |
| $a_{MS}$      | 0.487   | 0.5     | 0.516   | 0.534   | 0.564   | 0.581   |
| $\sigma$      | 0.16    | 0.16    | 0.16    | 0.161   | 0.163   | 0.164   |

304

306

308

310

312

314

316

318

320

322

324

326

328

330

332

334

336

338

340

342

344

346

348 **Table S4:** Numerical LOO, WAIC, LPML, and  $R^2$  results are displayed in the following tables. Lower LOO and  
 350 WAIC values are preferred. Higher LPML values are preferred. Tables are presented in the order of (a) CON SOC-  
 varied runs; (b) AWB SOC-varied runs; (c) CON MIC-varied runs; and (d) AWB MIC-varied runs.

352 (a) CON goodness-of-fit metrics for SOC-varied runs

| Parameter | SOC50   | SOC75   | SOC100  | SOC125 | SOC150 | SOC175 | SOC200 |
|-----------|---------|---------|---------|--------|--------|--------|--------|
| LOO       | -15.704 | -14.929 | -11.918 | -9.844 | -8.51  | -7.574 | -6.891 |
| WAIC      | -15.818 | -15.002 | -11.992 | -9.92  | -8.58  | -7.639 | -6.966 |
| LPML      | 7.849   | 7.465   | 5.959   | 4.92   | 4.256  | 3.788  | 3.439  |
| $R^2$     | 0.627   | 0.596   | 0.496   | 0.413  | 0.351  | 0.304  | 0.269  |

(b) AWB goodness-of-fit metrics for SOC-varied runs

| Parameter | SOC50   | SOC75   | SOC100 | SOC125 | SOC150 | SOC175 | SOC200 |
|-----------|---------|---------|--------|--------|--------|--------|--------|
| LOO       | -11.028 | -10.633 | -8.388 | -7.732 | -7.084 | -6.525 | -5.97  |
| WAIC      | -11.379 | -11.123 | -9.284 | -8.446 | -7.733 | -7.114 | -6.579 |
| LPML      | 5.499   | 5.312   | 4.252  | 3.9    | 3.547  | 3.254  | 3.002  |
| $R^2$     | 0.572   | 0.585   | 0.528  | 0.492  | 0.463  | 0.435  | 0.406  |

354 (c) CON goodness-of-fit metrics for MIC-varied runs

| Parameter | MIC1    | MIC2    | MIC3    | MIC4    | MIC6    | MIC8    |
|-----------|---------|---------|---------|---------|---------|---------|
| LOO       | -11.963 | -11.918 | -11.931 | -11.887 | -11.808 | -11.731 |
| WAIC      | -12.035 | -11.992 | -12.004 | -11.966 | -11.881 | -11.802 |
| LPML      | 5.982   | 5.959   | 5.966   | 5.943   | 5.904   | 5.865   |
| $R^2$     | 0.498   | 0.496   | 0.496   | 0.496   | 0.493   | 0.49    |

356 (d) AWB goodness-of-fit metrics for MIC-varied runs

| Parameter | MIC1   | MIC2   | MIC3   | MIC4   | MIC6   | MIC8   |
|-----------|--------|--------|--------|--------|--------|--------|
| LOO       | -8.63  | -8.388 | -8.587 | -8.462 | -8.219 | -8.181 |
| WAIC      | -9.302 | -9.284 | -9.213 | -9.079 | -8.863 | -8.711 |
| LPML      | 4.314  | 4.252  | 4.204  | 4.203  | 4.116  | 4.088  |
| $R^2$     | 0.526  | 0.528  | 0.525  | 0.521  | 0.516  | 0.513  |

358

360

362

364

366

368

370

372

374

376 **Figure S4:** Change in fit metrics for AWB and CON as pre-warming steady state MIC is varied from 1 to 8 mg C g<sup>-1</sup> soil. (a) LOO; (b) WAIC; (c) LPML; (d) R<sup>2</sup>

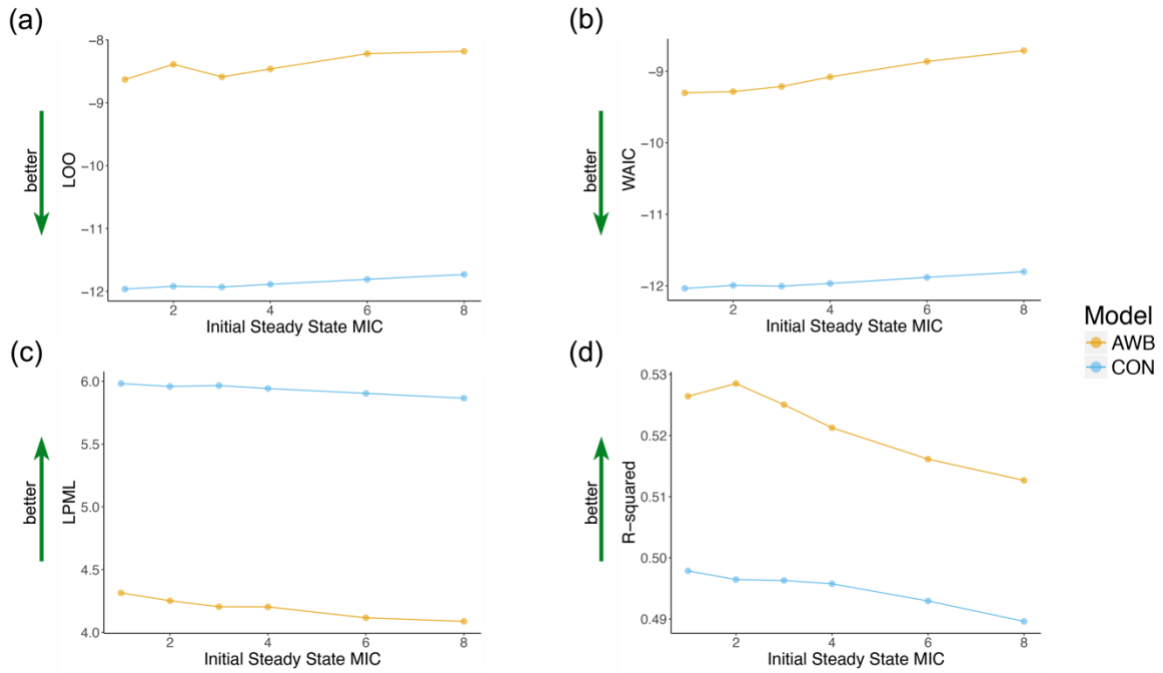

378

380

382

384

386

388

390

392

394

396

398

400

402

404

406

408 **Figure S5:** Trace plots for AWB and CON parameters indicate that the Markov chains were well-mixed with  
 appropriate burn-in. Example trace plots depicted in which pre-warming SOC = 100 mg C g<sup>-1</sup> soil, MIC = 2 mg C g<sup>-1</sup>  
 410 <sup>1</sup> soil, DOC = 0.2 mg C g<sup>-1</sup> soil, and (for AWB) ENZ = 0.1 mg C g<sup>-1</sup> soil. **(a)** CON *Ea* parameters; **(b)** CON partition  
 fraction parameters; **(c)** AWB *Ea* parameters; **(d)** AWB parameters  $V_{ref}$ ,  $E_{Cref}$ ,  $a_{MS}$ ,  $V_{Uref}$ , and  $m_t$ . The red ticks at  
 412 the bottom of the AWB panels indicate divergent transitions on one out of the four chains.

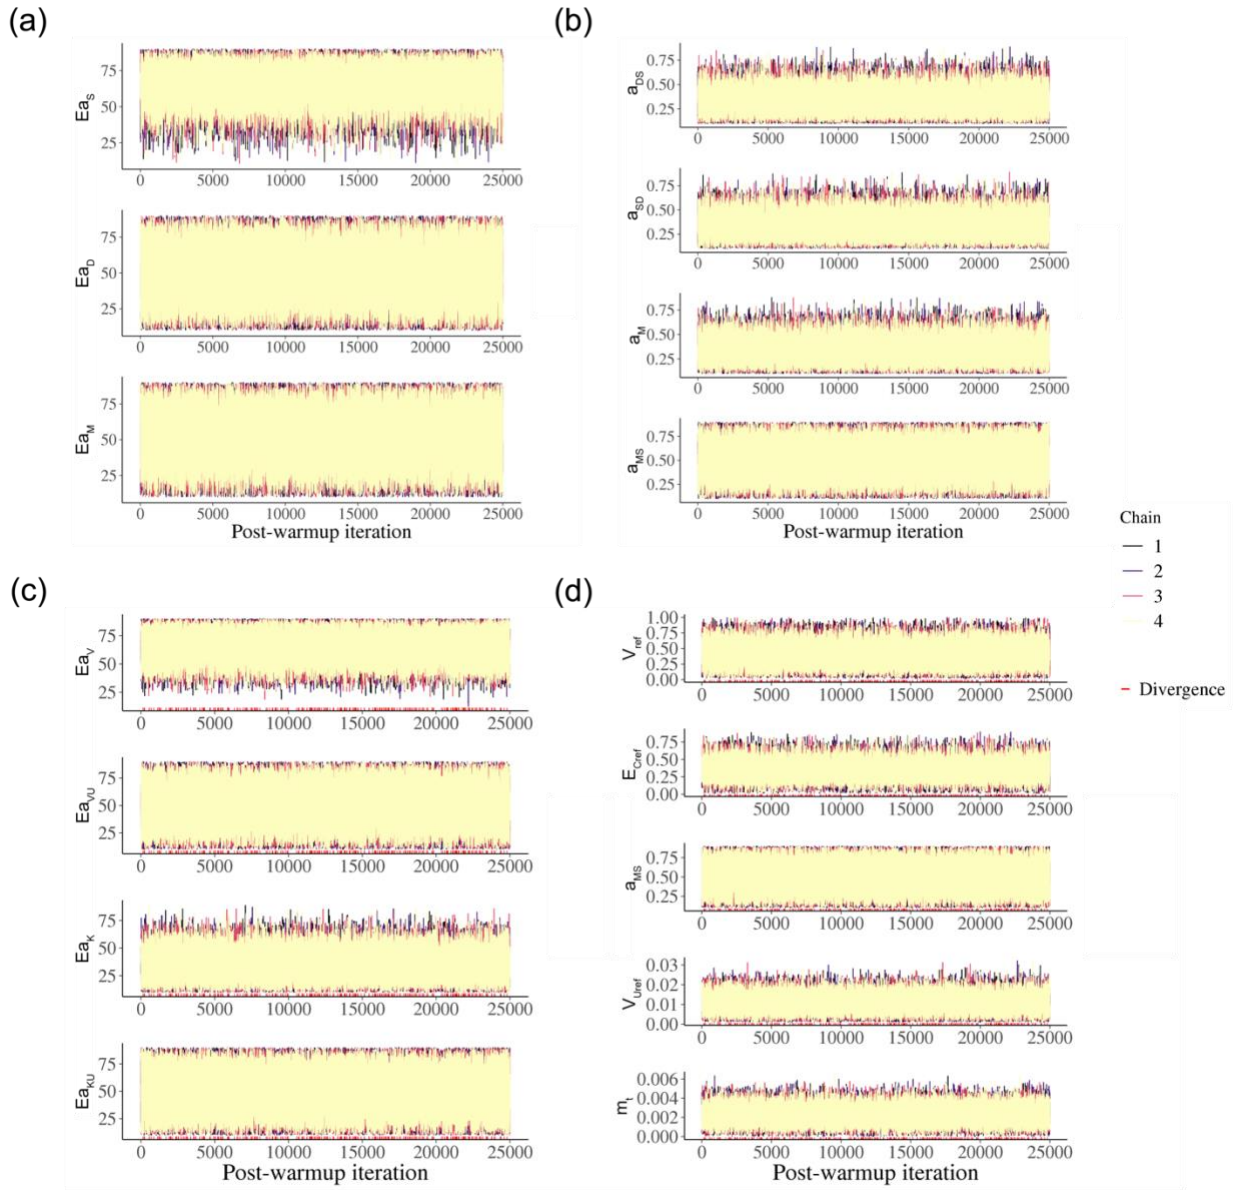

414

416

418

420

422

424 **Figure S6:** Autocorrelation plots for pre-warming SOC = 100 mg C g<sup>-1</sup> soil, MIC = 2 mg C g<sup>-1</sup> soil, DOC = 0.2 mg  
 426 C g<sup>-1</sup> soil, and (for AWB) ENZ = 0.1 mg C g<sup>-1</sup> soil indicate effective sample collection. For all fitted AWB and CON  
 428 parameters, autocorrelation, or the dependence between values of the same parameter accepted by Markov chains,  
 430 tends to drop as lag, the distance between MCMC iterations increases. Low autocorrelation indicates more  
 independence between samples and more efficient collection of effective samples for inference. **(a)** CON *Ea*  
 parameters; **(b)** CON partition fraction parameters; **(c)** AWB *Ea* parameters; **(d)** AWB parameters  $V_{ref}$ ,  $E_{Cref}$ ,  $a_{MS}$ ,  
 $V_{Uref}$ , and  $m_t$ .

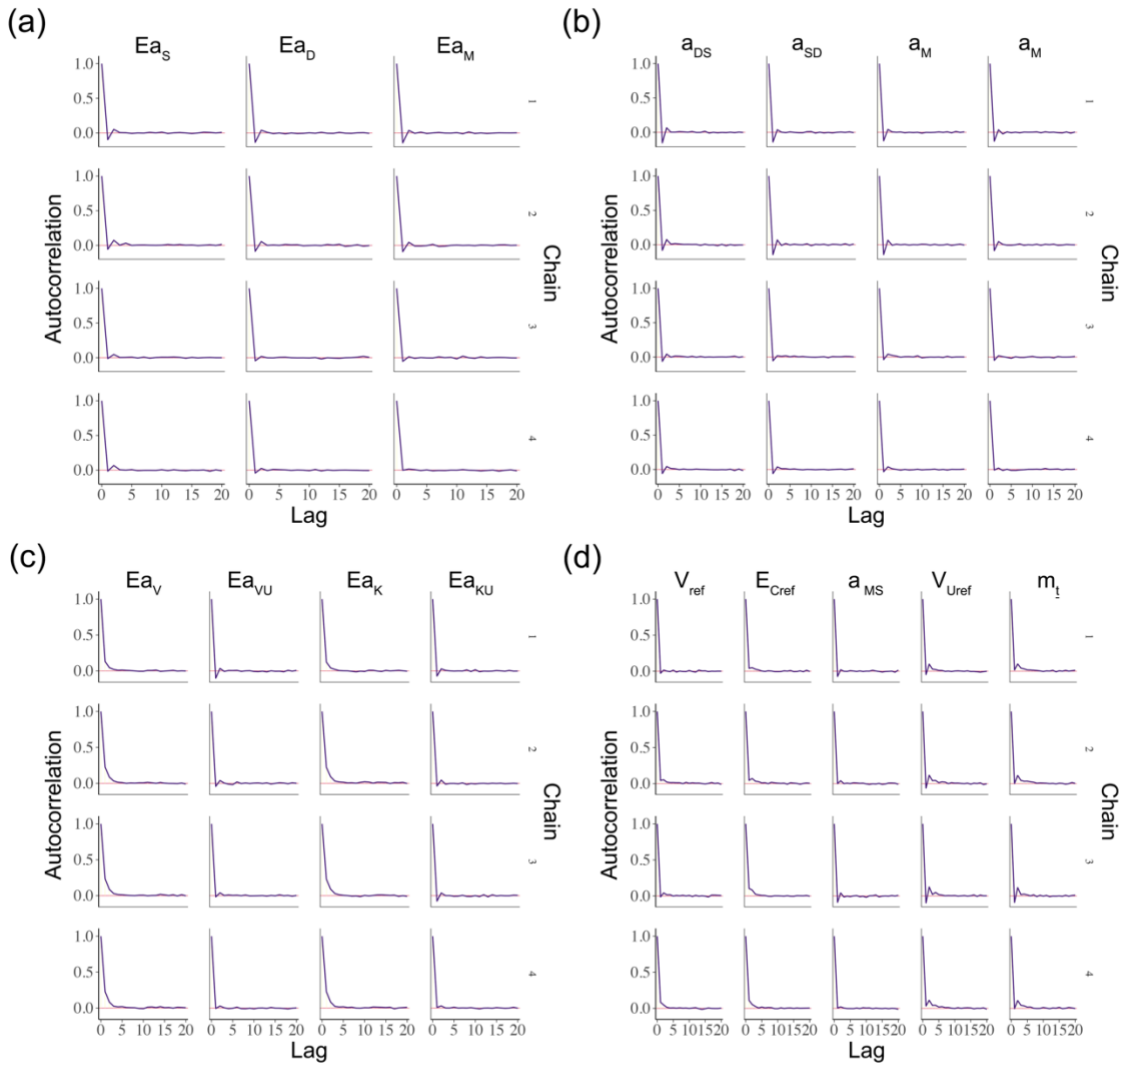

432

434

436

438



440 **Figure S7:**  $\hat{R}$  is a Bayesian diagnostic measure that estimates the degree of convergence between multiple Markov  
 442 chains. An  $\hat{R}$  value that approaches 1 as the number of Markov chain iterations increase is ideal. Plots demonstrating  
 444 convergence of  $\hat{R}$  values to 1 are presented for (a) CON; and (b) AWB parameters corresponding to simulations  
 using pre-warming SOC = 100 mg C g<sup>-1</sup> soil, MIC = 2 mg C g<sup>-1</sup> soil, DOC = 0.2 mg C g<sup>-1</sup> soil, and (for AWB) ENZ  
 = 0.1 mg C g<sup>-1</sup> soil.

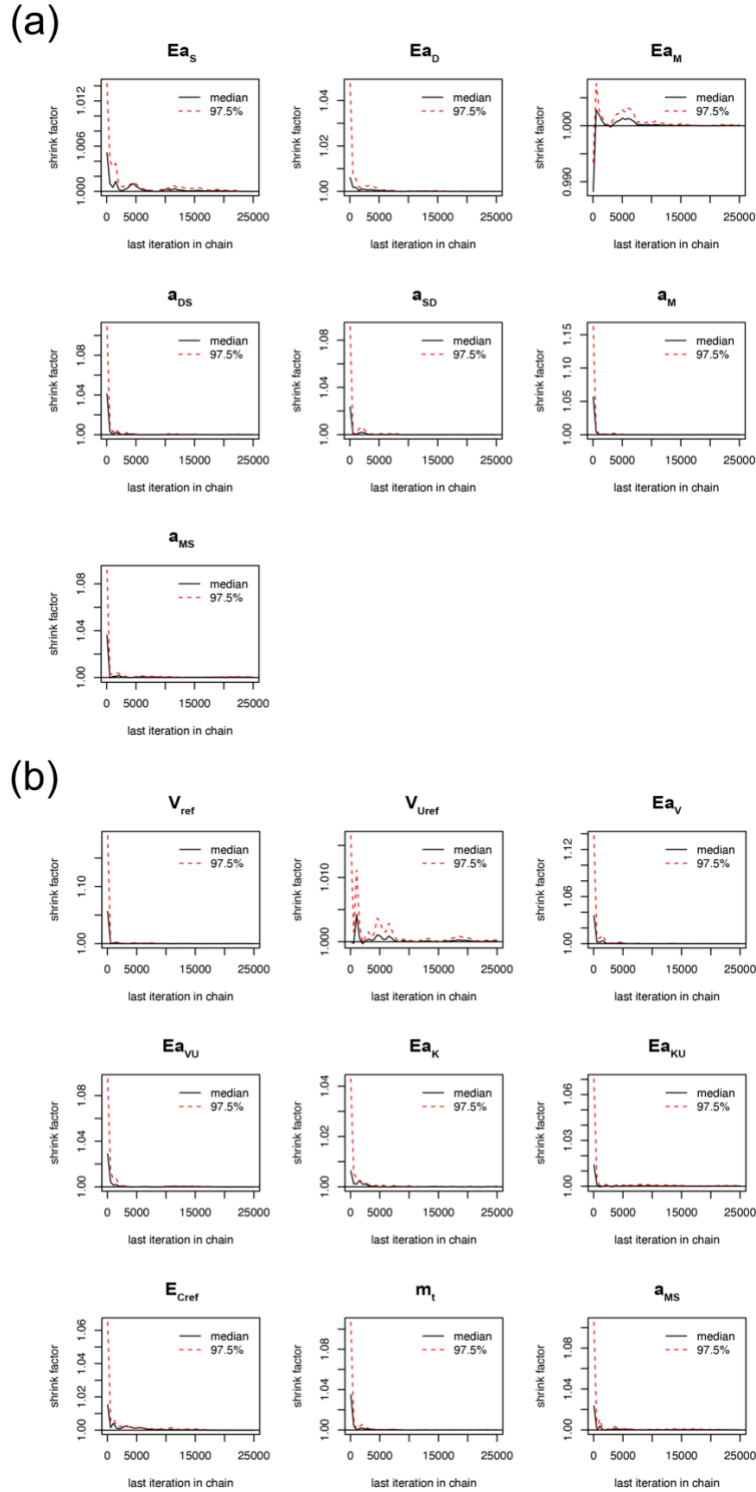

446 **Table S5:** CON and AWB model parameter effective sample size fractions  $N_{\text{eff}} / N$  (ratio of effective posterior  
 448 samples to total posterior samples where  $N = 100,000$ ) calculations from posterior. Ratios that are closer to 1.0 are  
 450 preferred. Tables are presented in the order of **(a)** CON SOC-varied runs; **(b)** AWB SOC-varied runs; **(c)** CON  
 MIC-varied runs; and **(d)** AWB MIC-varied runs.

**(a) CON SOC-varied runs**

| Parameter | SOC50 | SOC75 | SOC100 | SOC125 | SOC150 | SOC175 | SOC200 |
|-----------|-------|-------|--------|--------|--------|--------|--------|
| $Ea_S$    | 0.877 | 0.848 | 0.935  | 0.924  | 0.867  | 0.884  | 0.87   |
| $Ea_D$    | 1.0   | 1.0   | 1.0    | 1.0    | 1.0    | 1.0    | 1.0    |
| $Ea_M$    | 1.0   | 1.0   | 1.0    | 1.0    | 1.0    | 1.0    | 1.0    |
| $a_{DS}$  | 0.974 | 0.949 | 0.974  | 1.0    | 1.0    | 0.953  | 1.0    |
| $a_{SD}$  | 0.95  | 0.957 | 1.0    | 1.0    | 0.925  | 1.0    | 1.0    |
| $a_M$     | 0.93  | 0.919 | 1.0    | 1.0    | 0.987  | 0.987  | 0.955  |
| $a_{MS}$  | 1.0   | 1.0   | 1.0    | 1.0    | 1.0    | 1.0    | 1.0    |
| $\sigma$  | 0.686 | 0.653 | 0.719  | 0.732  | 0.693  | 0.689  | 0.691  |

**(b) AWB SOC-varied runs**

| Parameter     | SOC50 | SOC75 | SOC100 | SOC125 | SOC150 | SOC175 | SOC200 |
|---------------|-------|-------|--------|--------|--------|--------|--------|
| $V_{ref}$     | 0.594 | 0.883 | 0.81   | 0.914  | 0.959  | 0.816  | 0.707  |
| $V_{U_{ref}}$ | 0.699 | 0.705 | 0.704  | 0.723  | 0.694  | 0.64   | 0.629  |
| $Ea_V$        | 0.568 | 0.687 | 0.579  | 0.561  | 0.511  | 0.413  | 0.423  |
| $Ea_{VU}$     | 0.961 | 1.0   | 1.0    | 1.0    | 1.0    | 0.95   | 0.845  |
| $Ea_K$        | 0.463 | 0.687 | 0.599  | 0.527  | 0.519  | 0.424  | 0.428  |
| $Ea_{KU}$     | 0.995 | 1.0   | 1.0    | 1.0    | 1.0    | 0.949  | 0.828  |
| $E_{C_{ref}}$ | 0.439 | 0.635 | 0.698  | 0.65   | 0.458  | 0.339  | 0.261  |
| $m_t$         | 0.625 | 0.668 | 0.679  | 0.722  | 0.625  | 0.638  | 0.556  |
| $a_{MS}$      | 1.0   | 1.0   | 1.0    | 1.0    | 1.0    | 0.879  | 0.793  |
| $\sigma$      | 0.529 | 0.638 | 0.612  | 0.65   | 0.681  | 0.579  | 0.533  |

**(c) CON MIC-varied runs**

| Parameter | MIC1  | MIC2  | MIC3  | MIC4  | MIC6  | MIC8  |
|-----------|-------|-------|-------|-------|-------|-------|
| $Ea_S$    | 0.863 | 0.935 | 0.879 | 0.881 | 0.943 | 0.984 |
| $Ea_D$    | 1.0   | 1.0   | 1.0   | 1.0   | 1.0   | 1.0   |
| $Ea_M$    | 1.0   | 1.0   | 1.0   | 1.0   | 1.0   | 1.0   |
| $a_{DS}$  | 0.968 | 0.974 | 0.964 | 0.966 | 0.936 | 1.0   |
| $a_{SD}$  | 0.971 | 1.0   | 0.947 | 0.935 | 0.958 | 1.0   |
| $a_M$     | 0.995 | 1.0   | 1.0   | 0.917 | 0.957 | 0.97  |
| $a_{MS}$  | 1.0   | 1.0   | 1.0   | 1.0   | 1.0   | 1.0   |
| $\sigma$  | 0.68  | 0.719 | 0.699 | 0.659 | 0.689 | 0.747 |

**(d) AWB MIC-varied runs**

| Parameter | MIC1  | MIC2 | MIC3 | MIC4  | MIC6  | MIC8  |
|-----------|-------|------|------|-------|-------|-------|
| $V_{ref}$ | 0.673 | 0.81 | 0.84 | 0.761 | 0.851 | 0.907 |

|               |       |       |       |       |       |       |
|---------------|-------|-------|-------|-------|-------|-------|
| $V_{U_{ref}}$ | 0.705 | 0.704 | 0.693 | 0.62  | 0.722 | 0.702 |
| $Ea_V$        | 0.536 | 0.579 | 0.611 | 0.563 | 0.621 | 0.632 |
| $Ea_{VU}$     | 0.968 | 1.0   | 1.0   | 0.935 | 1.0   | 1.0   |
| $Ea_K$        | 0.44  | 0.599 | 0.403 | 0.523 | 0.622 | 0.609 |
| $Ea_{KU}$     | 0.985 | 1.0   | 1.0   | 0.921 | 1.0   | 1.0   |
| $E_{C_{ref}}$ | 0.486 | 0.698 | 0.432 | 0.582 | 0.534 | 0.547 |
| $m_t$         | 0.539 | 0.679 | 0.739 | 0.632 | 0.641 | 0.729 |
| $a_{MS}$      | 0.973 | 1.0   | 1.0   | 0.898 | 0.895 | 0.954 |
| $\sigma$      | 0.564 | 0.612 | 0.697 | 0.548 | 0.579 | 0.621 |

458

460

462

464

466

468

470

472

474

476

478

480

482

484

486

488

490

492

494 **Table S6:** Pareto  $k$  diagnostic counts for CON and AWB simulations sourced from LOO metric computations for  
 495 CON and AWB model fits.  $k$  diagnostics are calculated by fitting each set of leave-one-out importance ratios used to  
 496 evaluate LOO to the shape parameter of a Pareto distribution. In our case, each simulation will produce 13  $k$   
 497 parameters since there are 13 meta-analysis data points and consequently the same number of holdout sets.  $k$  gives  
 498 an indication on model quality and LOO result reliability. Having a higher proportion of lower  $k$  values are  
 499 preferred; samples are suitable if they fall within the intervals of  $(-\infty, 0.5)$  and  $(0.5, 0.7)$  and questionable if they are  
 500 higher. Having a high proportion of  $k$  values greater than 1 should raise concerns of unreliable information criteria  
 501 and cross validation results stemming from model specification issues. The presence of a diagnostic for LOO  
 502 renders it a superior Bayesian predictive metric; other predictive metrics lack reviewable diagnostics. Tables are  
 503 presented in the order of **(a)** CON SOC-varied runs; **(b)** AWB SOC-varied runs; **(c)** CON MIC-varied runs; and **(d)**  
 504 AWB MIC-varied runs.

**(a)** CON SOC-varied runs

| $k$ interval     | SOC50 | SOC75 | SOC100 | SOC125 | SOC150 | SOC175 | SOC200 |
|------------------|-------|-------|--------|--------|--------|--------|--------|
| $(-\infty, 0.5]$ | 13    | 13    | 13     | 13     | 13     | 13     | 12     |
| $(0.5, 0.7]$     | 0     | 0     | 0      | 0      | 0      | 0      | 1      |
| $(0.7, 1]$       | 0     | 0     | 0      | 0      | 0      | 0      | 0      |
| $(1, \infty]$    | 0     | 0     | 0      | 0      | 0      | 0      | 0      |

**(b)** AWB SOC-varied runs

| $k$ interval     | SOC50 | SOC75 | SOC100 | SOC125 | SOC150 | SOC175 | SOC200 |
|------------------|-------|-------|--------|--------|--------|--------|--------|
| $(-\infty, 0.5]$ | 11    | 11    | 12     | 12     | 12     | 11     | 12     |
| $(0.5, 0.7]$     | 2     | 2     | 0      | 0      | 0      | 2      | 1      |
| $(0.7, 1]$       | 0     | 0     | 1      | 1      | 1      | 0      | 0      |
| $(1, \infty]$    | 0     | 0     | 0      | 0      | 0      | 0      | 0      |

**(c)** CON MIC-varied runs

| $k$ interval     | MIC1 | MIC2 | MIC3 | MIC4 | MIC6 | MIC8 |
|------------------|------|------|------|------|------|------|
| $(-\infty, 0.5]$ | 13   | 13   | 13   | 13   | 13   | 13   |
| $(0.5, 0.7]$     | 0    | 0    | 0    | 0    | 0    | 0    |
| $(0.7, 1]$       | 0    | 0    | 0    | 0    | 0    | 0    |
| $(1, \infty]$    | 0    | 0    | 0    | 0    | 0    | 0    |

**(d)** AWB MIC-varied runs

| $k$ interval     | MIC1 | MIC2 | MIC3 | MIC4 | MIC6 | MIC8 |
|------------------|------|------|------|------|------|------|
| $(-\infty, 0.5]$ | 12   | 12   | 12   | 11   | 12   | 12   |
| $(0.5, 0.7]$     | 0    | 0    | 1    | 2    | 0    | 1    |
| $(0.7, 1]$       | 1    | 1    | 0    | 0    | 1    | 0    |
| $(1, \infty]$    | 0    | 0    | 0    | 0    | 0    | 0    |

522 **Figure S8:** Plots of effective parameter counts for CON and AWB in SOC-varied and MIC-varied HMC runs.  
 524 Decreasing SOC in AWB and CON runs increased effective parameter count and over-fitting punishment in the LOO and WAIC calculations. Effective parameter counts computed as part of (a) LOO for SOC-varied runs; (b) WAIC for SOC-varied runs; (c) LOO for MIC-varied runs; and (d) WAIC for MIC-varied runs.

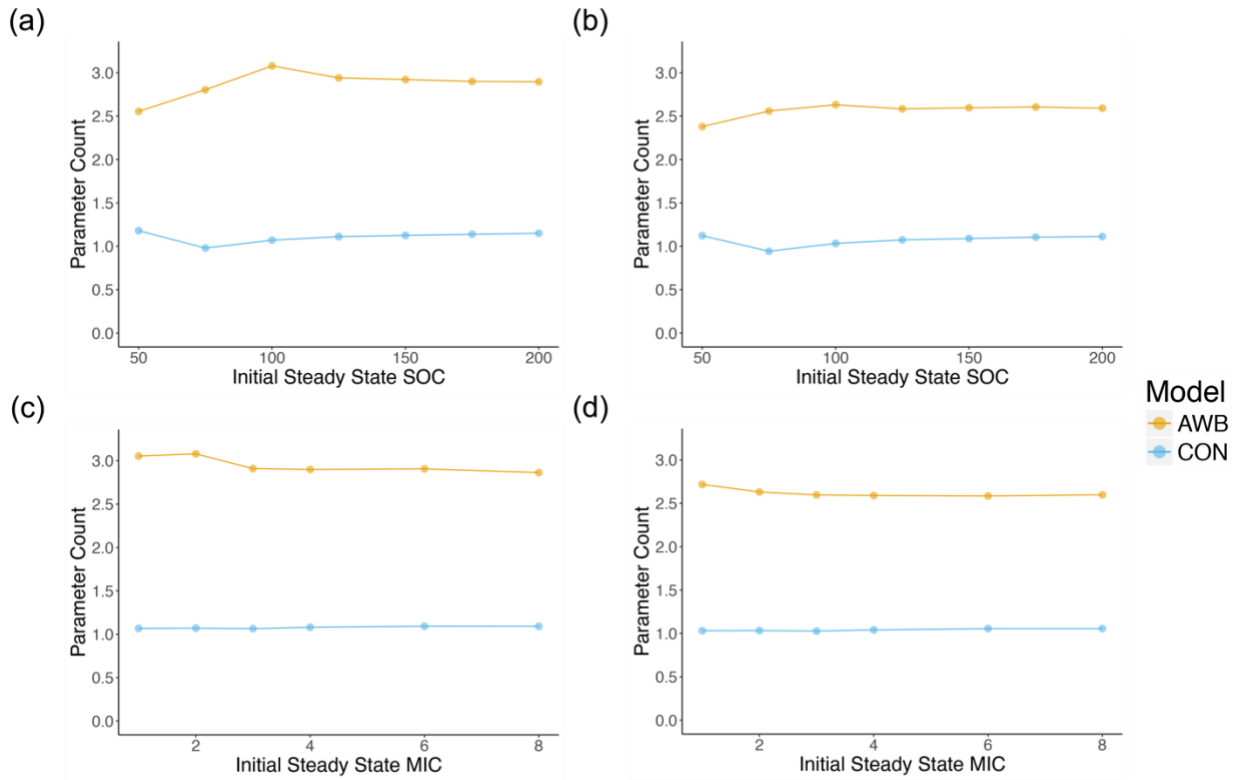

526  
 528  
 530  
 532  
 534  
 536  
 538  
 540  
 542  
 544  
 546  
 548

550 **Figure S9:** Ratio of divergent transitions to total posterior samples collected in AWB runs. Decreasing the MIC-to-  
SOC ratio in AWB runs corresponded to an increase in the number of divergent transitions. Divergent transition  
frequencies per 100,000 posterior samples in (a) SOC-varied runs; and (b) in MIC-varied runs.

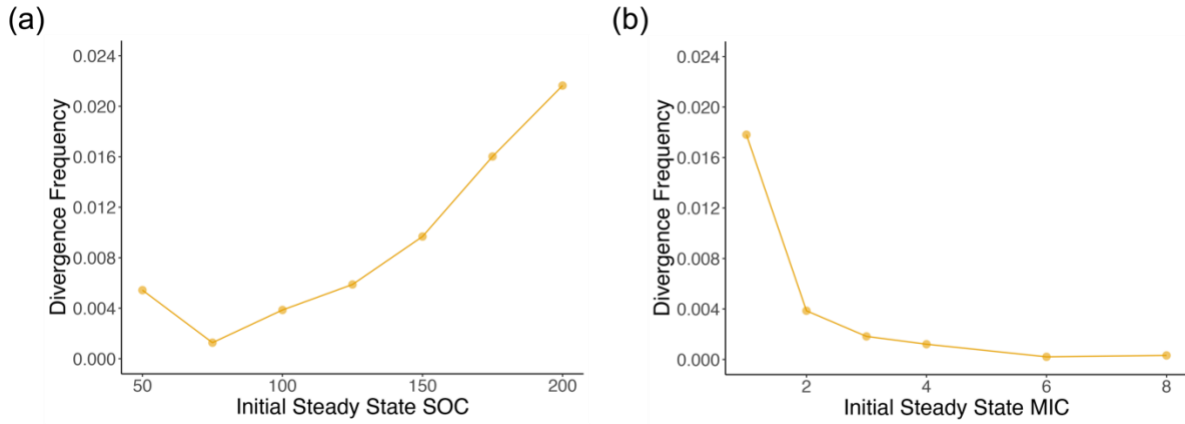

552  
554  
556  
558  
560  
562  
564  
566  
568  
570  
572  
574  
576  
578  
580  
582  
584  
586  
588

590 **Figure S10:** Response ratios of empirical SOC stocks from 143 field warming studies (van Gestel et al., 2018)  
592 plotted against study duration. A statistical analysis not accounting for sample size of each study found that the  
594 effect of study duration on response ratio was not significant ( $p = 0.7822$ ). Response ratios ranged from 0.544 to 1.9.  
Mean response ratio was 1.03, not accounting for sample sizes. The red dashed line at 1.0 divides studies in which  
an increase in SOC was observed from those in which a decrease was ultimately observed.

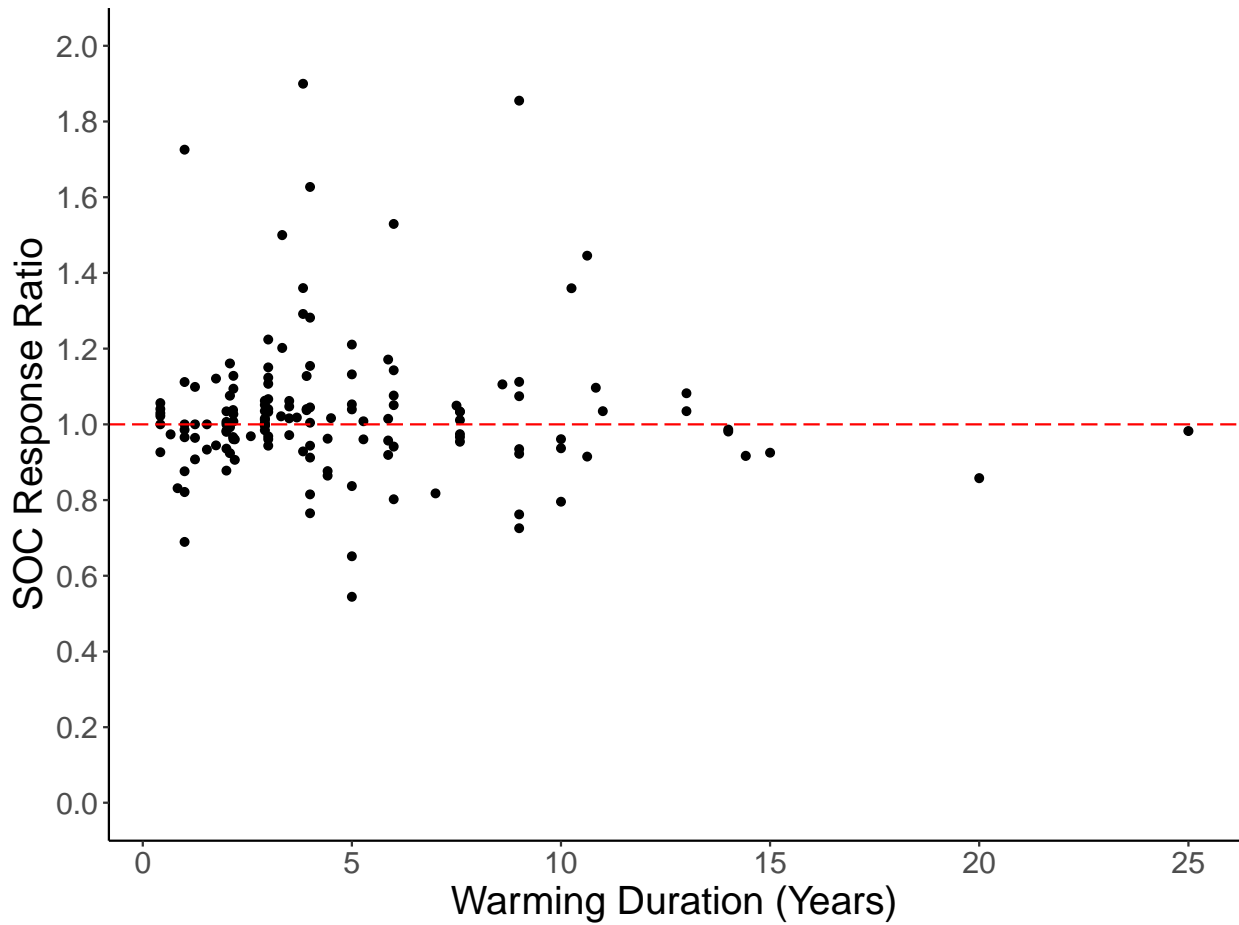

596  
598  
600  
602  
604  
606  
608  
610  
612

614 **Figure S11:** 95% credible areas for some (a) AWB and (b) CON parameters corresponding to pre-warming steady  
 616 state SOC = 50 mg C g<sup>-1</sup> soil, DOC = 0.2 mg C g<sup>-1</sup> soil, MIC = 2 mg C g<sup>-1</sup> soil, and ENZ = 0.1 mg C g<sup>-1</sup> soil. Yellow  
 shaded regions represent 80% credible areas and vertical purple lines indicate distribution mean. Note the deformity  
 of the  $E_{a_S}$  and  $E_{C_{ref}}$  densities. Parameter units are displayed in Supplemental Table 1.

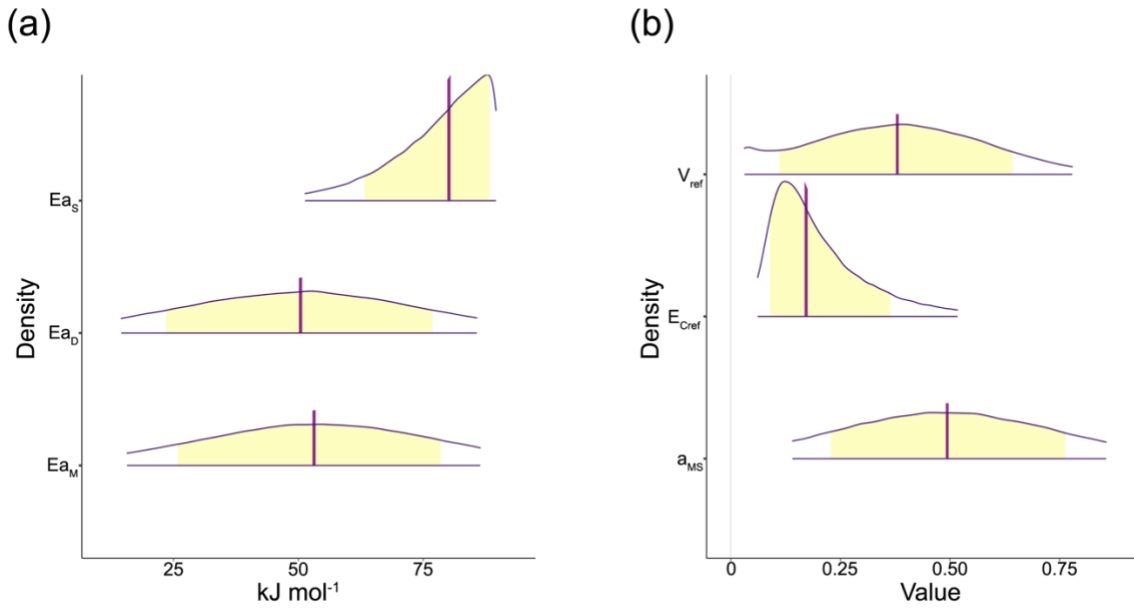

618
